# Supplementary material
Source: PubMed Central journal article supplement (PMC5408618)
Supplement: 10.1194_P075051_jlr.P075051-1.pdf [file 10.1194_P075051_jlr.P075051-1.pdf]

## Supplemental information

### **A newborn screening method for cerebrotendinous xanthomatosis using bile alcohol glucuronides and metabolite ratios**

Frédéric M. Vaz<sup>1\*</sup>, Albert H. Bootsma<sup>1</sup>, Willem Kulik<sup>1</sup>, Aad Verrips<sup>2</sup>, Ron A. Wevers<sup>3</sup>, Peter C. Schielen<sup>4</sup>,  
Andrea E. DeBarber<sup>5</sup>, Hidde H. Huidekoper<sup>6</sup>

<sup>1</sup>Department of Clinical Chemistry and Pediatrics, Laboratory of Genetic Metabolic Diseases (F0-224),  
Academic Medical Center, Meibergdreef 9, 1105 AZ Amsterdam, The Netherlands

<sup>2</sup>Department of Neurology, Canisius Wilhelmina Hospital, Nijmegen, The Netherlands

<sup>3</sup>Department of Laboratory Medicine, Translational Metabolic Laboratory, Radboud University Medical  
Centre, Nijmegen, The Netherlands

<sup>4</sup>Centre for Infectious Diseases Research, Diagnostics and Screening (IDS), National Institute for Public  
Health and the Environment (RIVM), Bilthoven, The Netherlands

<sup>5</sup>Department of Physiology & Pharmacology, Oregon Health & Science University, Portland, United  
States

<sup>6</sup>Department of Pediatrics, Center for Lysosomal and Metabolic Diseases, Erasmus Medical Center,  
Rotterdam, The Netherlands

Supplemental figure S1

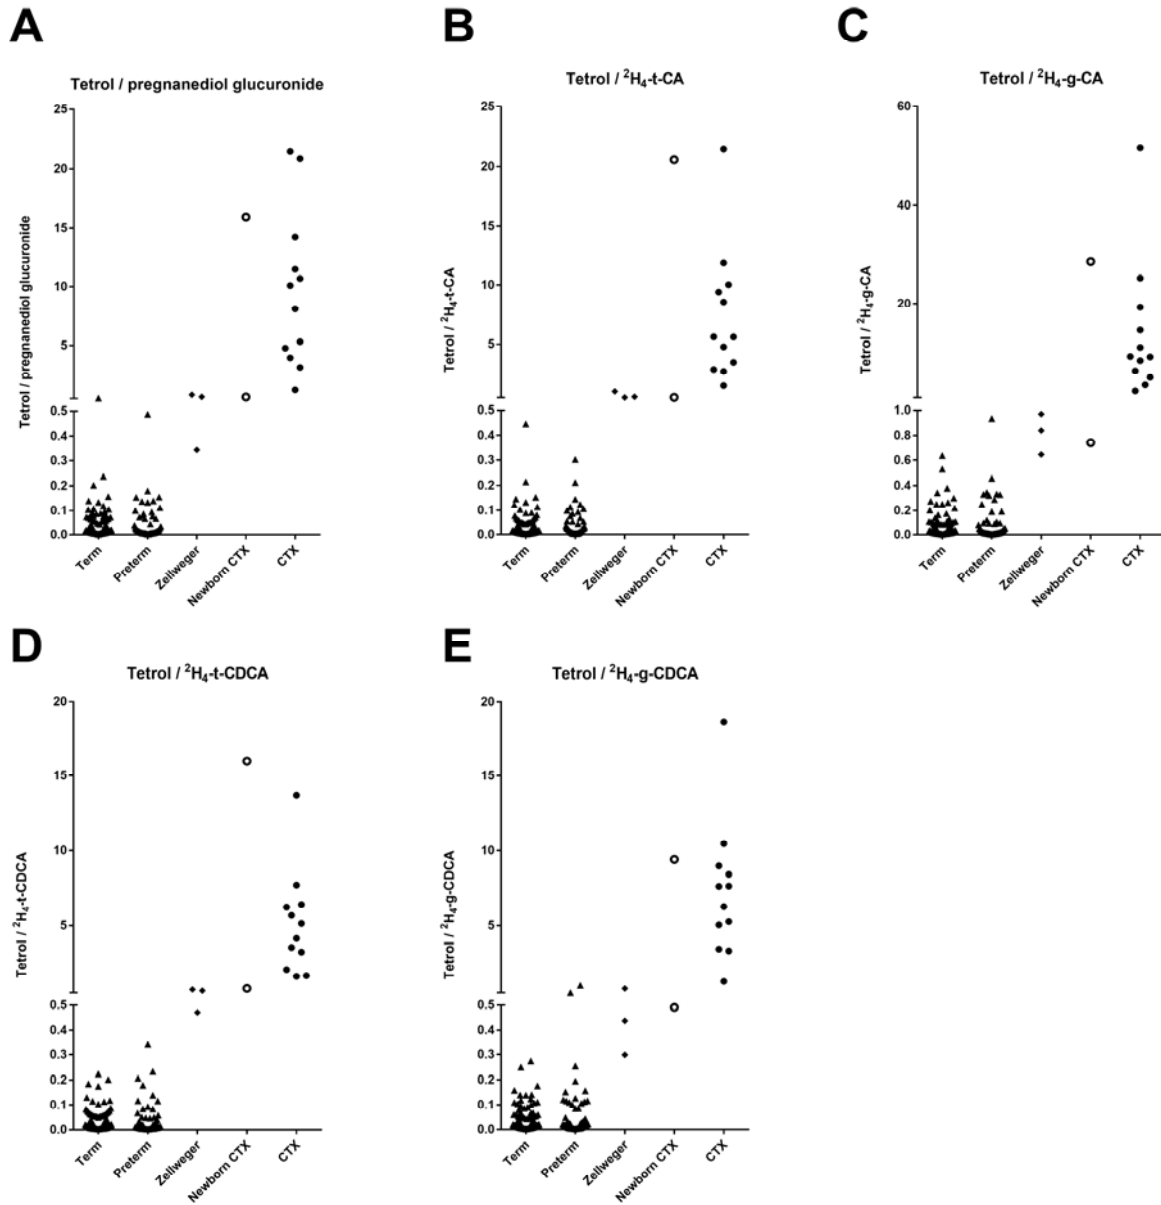

Tetrol response in term/preterm controls (triangle), Zellweger (diamond), newborn CTX and untreated CTX patients (open/closed circle) calculated using different internal standards, (A) pregnanediol glucuronide (B)  $^2\text{H}_4\text{-t-CA}$  (C)  $^2\text{H}_4\text{-g-CA}$  (D)  $^2\text{H}_4\text{-t-CDCA}$  and (E)  $^2\text{H}_4\text{-g-CDCA}$ . Despite a clear elevation of the tetrol response for all used internal standards, the separation of controls and CTX patients was not satisfactory. Zellwegers showed a considerably increased tetrol response which overlapped with the CTX range.

## Supplemental figure S2

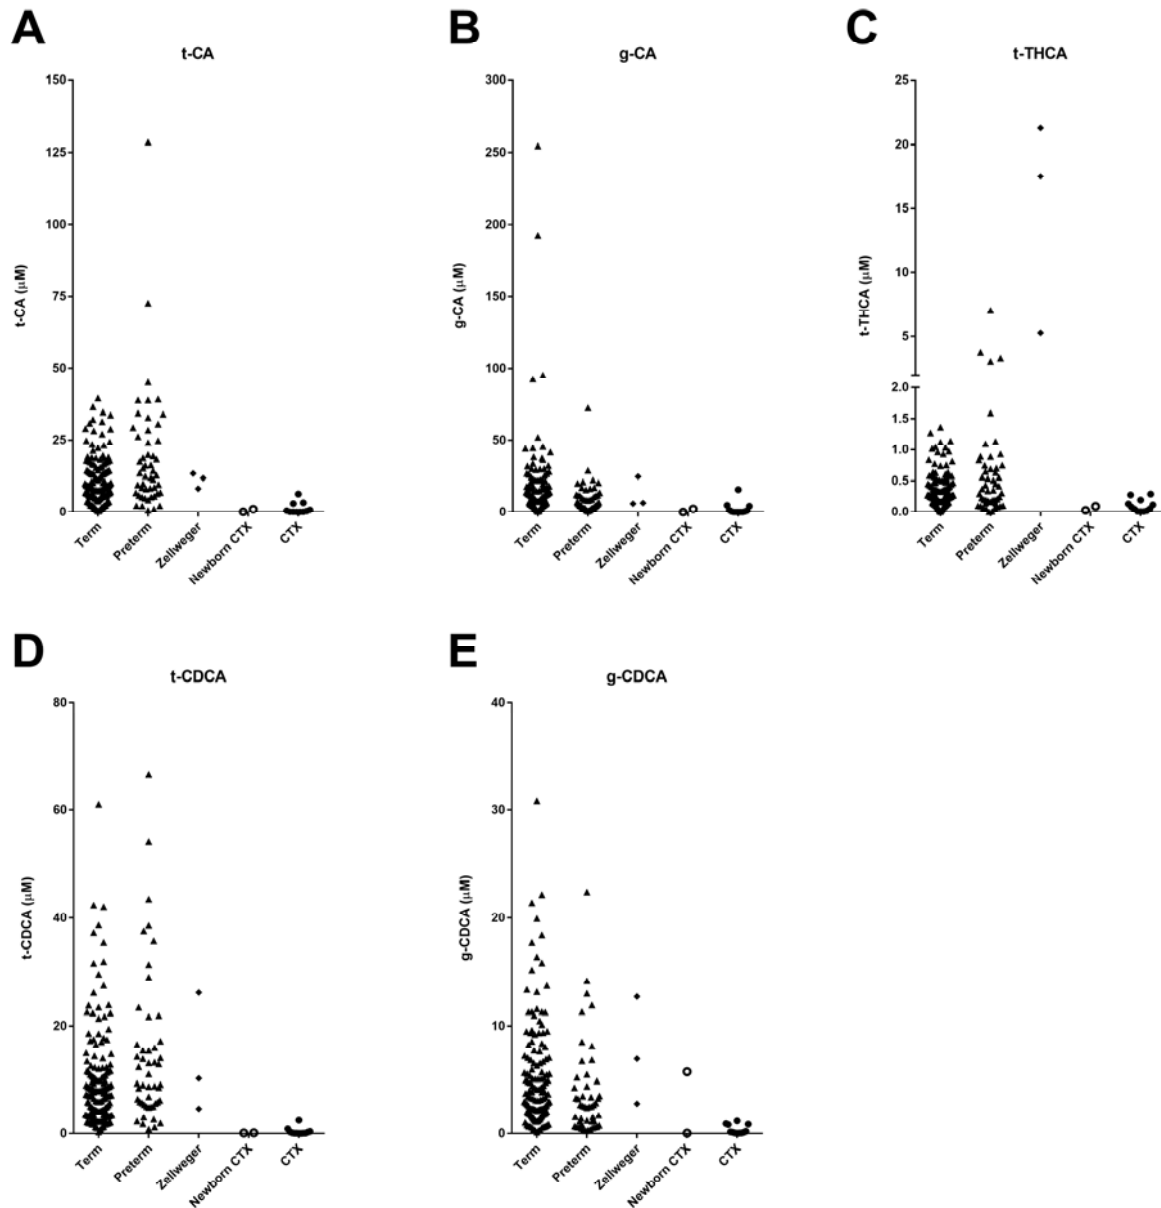

Concentrations of bile acid and the bile acid intermediate t-THCA in term/preterm controls (triangle), Zellweger (diamond), newborn CTX and untreated CTX patients (open/closed circle) calculated different internal standards, (A) t-CA, (B) g-CA, (C) t-THCA, (D) t-CDCA and (E) g-CDCA. Bile acid and t-THCA concentrations in CTX patients were at the low end of the control range. As expected, t-THCA clearly accumulated in Zellweger patients.

Supplemental figure S3

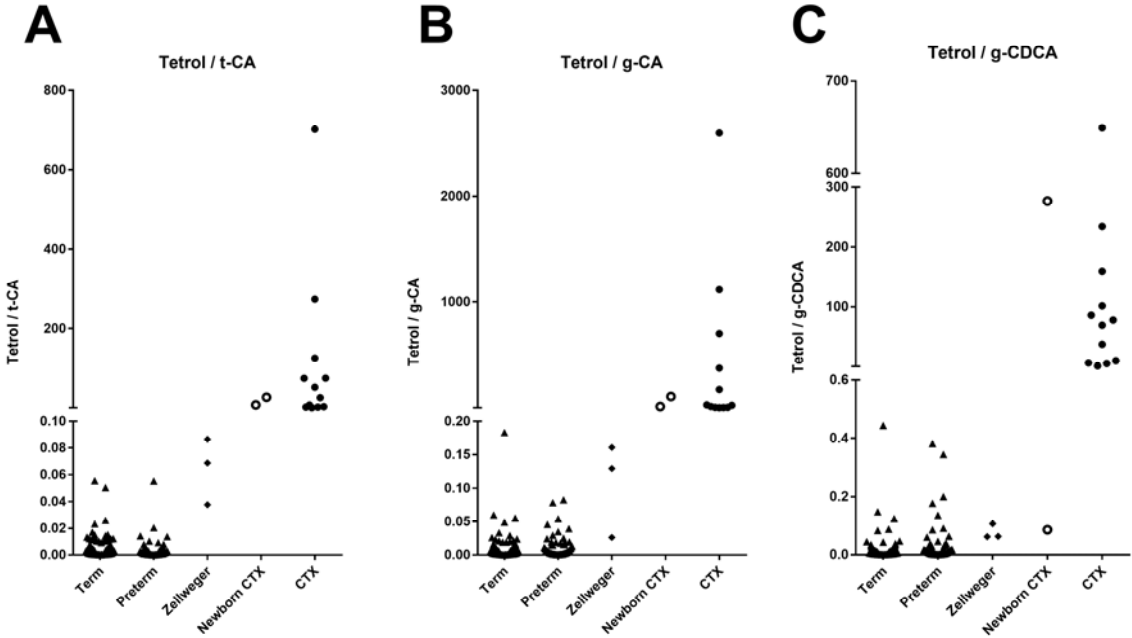

Other investigated metabolite ratios in term/preterm controls (triangle), Zellweger (diamond), newborn CTX and untreated CTX patients (open/closed circle): (A) tetrol/t-CA, (B) tetrol/g-CA and (C) tetrol/g-CDCA. All were less discriminative than the tetrol/t-CDCA ratio.

Supplemental figure S4

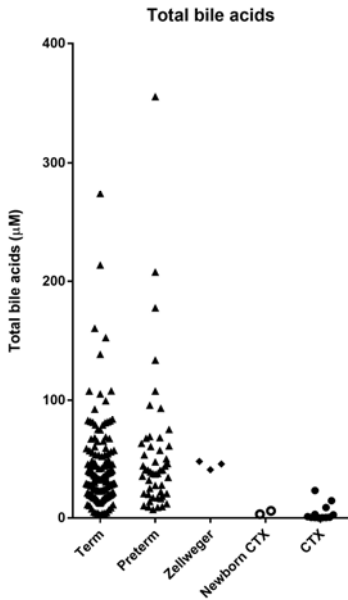

Total bile acid levels in term/preterm controls (triangle), Zellweger (diamond), newborn CTX and untreated CTX patients (open/closed circle).
